# Supplementary material
Source: PubMed Central journal article supplement (PMC11028243)
Supplement: 262_2018_2138_MOESM1_ESM.pdf [file 262_2018_2138_MOESM1_ESM.pdf]

## Supplemental Tables

**Supplemental Table 1: Tum-PD-L1%, Tum-B7-H3%, CD8 density, CD4 density, CD8-PD-1%, CD4-PD-1%, and TIL-PD-L1%<sup>a</sup> by immune status**

| Immune Status                                          |         | Tum-PD-L1 % | Tum-B7-H3 % | CD8 Density | CD4 Density | CD8-PD-1% | CD4-PD-1% | TIL-PD-L1% |
|--------------------------------------------------------|---------|-------------|-------------|-------------|-------------|-----------|-----------|------------|
| <b>All Patients<br/>N=66</b>                           | Mean    | 10.0        | 44.6        | 45.6        | 37.6        | 19.5      | 11.05     | 30.9       |
|                                                        | Median  | 0           | 40.0        | 40.0        | 30.0        | 20.0      | 10.0      | 25.0       |
|                                                        | Minimum | 0           | 0           | 0           | 0           | 0         | 0         | 0          |
|                                                        | Maximum | 80.0        | 100.0       | 100.0       | 90.0        | 60.0      | 30.0      | 90.0       |
| <b>Immunocompetent<br/>N=42</b>                        | Mean    | 11.4        | 51.7        | 43.5        | 37.8        | 18.9      | 10.85     | 34.4       |
|                                                        | Median  | 0           | 60.0        | 40.0        | 30.0        | 12.5      | 10.0      | 30.0       |
|                                                        | Minimum | 0           | 0           | 0           | 0           | 0         | 0         | 0          |
|                                                        | Maximum | 80.0        | 100.0       | 100.0       | 80.0        | 60.0      | 30.0      | 90.0       |
| <b>Immunosuppressed<br/>N=24</b>                       | Mean    | 7.5         | 32.9        | 49.4        | 37.3        | 20.4      | 11.25     | 24.5       |
|                                                        | Median  | 45.0        | 27.5        | 45.0        | 35.0        | 20.0      | 10.0      | 0          |
|                                                        | Minimum | 0           | 0           | 5.0         | 5.0         | 0         | 0         | 0          |
|                                                        | Maximum | 60.0        | 100.0       | 100.0       | 90.0        | 45.0      | 30.0      | 90.0       |
| <b>HIV<br/>N=8</b>                                     | Mean    | 0           | 16.3        | 70.0        | 37.5        | 25.6      | 10.6      | 30.6       |
|                                                        | Median  | 0           | 2.5         | 75.0        | 35.0        | 30.0      | 10.0      | 27.5       |
|                                                        | Minimum | 0           | 0           | 40.0        | 10.0        | 5.0       | 0         | 0          |
|                                                        | Maximum | 0           | 85.0        | 100.0       | 70.0        | 45.0      | 20.0      | 80.0       |
| <b>Other<br/>Immunosuppressed<sup>b</sup><br/>N=16</b> | Mean    | 11.3        | 40.3        | 39.1        | 37.2        | 17.8      | 11.6      | 21.3       |

|  |         |      |       |      |      |      |      |      |
|--|---------|------|-------|------|------|------|------|------|
|  | Median  | 0    | 35.0  | 25.0 | 35.0 | 20.0 | 10.0 | 0    |
|  | Minimum | 0    | 0     | 5.0  | 5.0  | 0    | 0    | 0    |
|  | Maximum | 60.0 | 100.0 | 90.0 | 90.0 | 40.0 | 30.0 | 90.0 |

<sup>a</sup>Tum-PD-L1% = percentage of tumor cells expressing PD-L1. Tum-B7-H3% = percentage of tumor cells expressing B7-H3. CD8 Density = the percentage of peritumoral stroma infiltrated by CD8 positive lymphocytes. CD4 Density = the percentage of peritumoral stroma infiltrated by CD4 positive lymphocytes. CD8-PD-1% = the percentage of CD8-positive tumor infiltrating lymphocytes that which expressed PD-1. CD4-PD-1% - the percentage of CD4-positive tumor infiltrating lymphocytes that which expressed PD-1. TII-PD-L1% = percentage of tumor infiltrating lymphocytes that express PD-L1. <sup>b</sup>Other immunosuppressed includes 12 organ transplant and 4 of other etiology (CLL, Inflammatory Bowel Disease on immunosuppression)

**Supplemental Table 2: Evaluation of Lymph-PD-L1%, Lymph-B7-H3%, CD8 Density, CD8-PD-1%<sup>a</sup> in Organ transplant graft and tumor samples**

| Patient | Specimen    | Acute Rejection (Y/N) | IC-PD-L1% | CD8-PD-1% | IC-B7-H3% | Tum-B7-H3% | CD8 Density | Tum-PD-L1% |
|---------|-------------|-----------------------|-----------|-----------|-----------|------------|-------------|------------|
| 1       | Tumor       |                       | 0         | 5         |           | 25         | 10          | 0          |
|         | Renal Graft | N                     | 10        | 1         | 0         |            | 80          |            |
|         | Renal Graft | Y                     | 60        | 10        | 0         |            | 80          |            |
| 2       | Tumor       |                       | 30        | 30        |           | 5          | 70          | 0          |
|         | Renal Graft | N                     | 10        | 5         | 0         |            | 80          |            |
|         |             |                       |           |           |           |            |             |            |
| 3       | Tumor       |                       | 0         | 10        |           | 100        | 20          | 0          |
|         | Lung graft  | Y                     | 10        | 10        | 0         |            | 10          |            |
|         | Lung graft  | N                     | 0         | 5         | 0         |            | 40          |            |
| 4       | Tumor       |                       | 30        |           |           | 75         | 80          | 10         |
|         | Lung graft  | N                     | 0         | 0         | 0         |            | 30          |            |
|         | Lung graft  | Y                     | 0         | 5         | 0         |            | 40          |            |
| 5       | Tumor       |                       | 0         | 10        |           | 60         | 10          | 30         |
|         | Lung graft  | N                     | 0         | 5         | 0         |            | 20          |            |
|         | Lung graft  | Y                     | 0         | 10        | 0         |            | 20          |            |
| 6       | Tumor       |                       | 0         | 25        |           | 10         | 5           | 0          |
|         | Lung graft  | Y                     | 0         | 20        | 0         |            | 20          |            |
|         | Lung graft  | N                     | 0         | 5         | 0         |            | 30          |            |
| 7       | Tumor       |                       | 10        | 20        |           | 30         | 30          | 0          |
|         | Renal graft | N                     | 0         | 0         | 0         |            | 10          |            |
|         | Renal graft | Y                     | 10        | 20        | 0         |            | 80          |            |
| 8       | Tumor       |                       | 5         | 10        |           | 40         | 90          | 0          |
|         | Heart graft | N                     | 0         | 10        | 0         |            | 20          |            |

<sup>a</sup>IC-PD-L1% = percentage of immune cells in graft or tumor infiltrating immune cells expressing PD-L1. CD8-PD-1% = the percentage of CD8-positive tumor infiltrating lymphocytes or CD8 positive lymphocytes in the graft that expressed PD-1. IC-B7-H3% = percentage of lymphocytes in graft expressing B7-H3. Tum-B7-H3 = the percentage of tumor cells expressing B7-H3. CD8 Density = the percentage of peritumoral stroma infiltrated by CD8 positive lymphocytes or CD8 positive lymphocytes in the graft. Tum-PD-L1= the percentage of tumor cells expressing PD-L1.
